# Supplementary material
Source: PubMed Central journal article supplement (PMC9169055)

## Web Material

### **Factors Associated with Willingness to Receive a COVID-19 Vaccine among 23,819 Adults Aged 50 years and Older: An Analysis of the Canadian Longitudinal Study on Aging**

Nicole E. Basta, Nazmul Sohel, Giorgia Sulis, Christina Wolfson, Geva Maimon, Lauren E. Griffith, Susan Kirkland, Jacqueline M. McMillan, Mary Thompson, Parminder Raina, on behalf of the Canadian Longitudinal Study on Aging (CLSA) Team.

#### **Table of Contents**

|                                                                                                                                                                                                                      |           |
|----------------------------------------------------------------------------------------------------------------------------------------------------------------------------------------------------------------------|-----------|
| <b>Web Table 1: Demographic characteristics of participants and non-participants .....</b>                                                                                                                           | <b>2</b>  |
| <b>Web Table 2: Distribution of self-reported reasons for being likely to receive a COVID-19 vaccine .....</b>                                                                                                       | <b>3</b>  |
| <b>Web Table 3: Response options for survey questions about prior influenza vaccination history and pandemic-related factors of interest .....</b>                                                                   | <b>4</b>  |
| <b>Web Table 4: Distribution of self-reported influenza vaccination status (fall 2020), belief in having been previously infected with SARS-CoV-2, and impact of the pandemic on participant and household .....</b> | <b>5</b>  |
| <b>Web Table 5: Association between participants' sociodemographic characteristics and being likely to receive a COVID-19 vaccine .....</b>                                                                          | <b>6</b>  |
| <b>Web Table 6: Association between prior influenza vaccination and pandemic-specific factors and being likely to receive a COVID-19 vaccine .....</b>                                                               | <b>7</b>  |
| <b>Web Figure 1: Distribution of self-reported likelihood of receiving a COVID-19 vaccination, by age, sex and race.....</b>                                                                                         | <b>8</b>  |
| <b>Web Figure 2: Distribution of self-reported likelihood of receiving a COVID-19 vaccination, by education and income level .....</b>                                                                               | <b>9</b>  |
| <b>Web Figure 3: Distribution of self-reported likelihood of receiving a COVID-19 vaccination, by province and urban/rural area of residence .....</b>                                                               | <b>10</b> |

**Web Table 1: Demographic characteristics of participants and non-participants.** Basic demographic characteristics of a) individuals who were invited to participate in the CLSA COVID-19 baseline survey and for whom data are available (n = 42,457), b) those who were invited but did not respond or refused (n = 13,898), c) those who completed the CLSA COVID-19 baseline survey (n = 28,559), and d) those who – after completing the COVID-19 baseline survey – also completed the COVID-19 exit survey (n = 24,112). Frequencies and proportions (with Clopper-Pearson 95% confidence intervals) are reported.

|                       | CLSA participants who were invited to participate in the COVID-19 questionnaire study |                  | CLSA participants who were invited to participate in the COVID-19 questionnaire study but did not respond or refused |                  | CLSA participants who consented to the COVID-19 questionnaire study and completed the COVID-19 baseline survey |                  | CLSA participants who completed both the COVID-19 baseline survey and the COVID-19 exit survey |                  |
|-----------------------|---------------------------------------------------------------------------------------|------------------|----------------------------------------------------------------------------------------------------------------------|------------------|----------------------------------------------------------------------------------------------------------------|------------------|------------------------------------------------------------------------------------------------|------------------|
|                       | n                                                                                     | % (95% CI)       | n                                                                                                                    | % (95% CI)       | n                                                                                                              | % (95% CI)       | n                                                                                              | % (95% CI)       |
| <b>Overall</b>        | 42,457(*)                                                                             | 100              | 13,898                                                                                                               | 100              | 28,559                                                                                                         | 100              | 24,112                                                                                         | 100              |
| <b>Age group</b>      |                                                                                       |                  |                                                                                                                      |                  |                                                                                                                |                  |                                                                                                |                  |
| 50–54                 | 2,519                                                                                 | 5.9 (5.7-6.2)    | 982                                                                                                                  | 7.1 (6.6-7.5)    | 1,537                                                                                                          | 5.3 (5.1-5.6)    | 1,109                                                                                          | 4.6 (4.3-4.9)    |
| 55–64                 | 13,506                                                                                | 31.8 (31.4-32.3) | 4541                                                                                                                 | 32.7 (31.9-33.5) | 8,965                                                                                                          | 31.4 (30.9-31.9) | 7,312                                                                                          | 30.3 (29.7-30.9) |
| 65–74                 | 14,129                                                                                | 33.3 (32.8-33.7) | 4,040                                                                                                                | 29.1 (28.3-29.8) | 10,089                                                                                                         | 35.3 (34.8-35.9) | 8,795                                                                                          | 36.5 (35.9-37.1) |
| ≥75                   | 12,302                                                                                | 29.0 (28.5-29.4) | 4,335                                                                                                                | 31.2 (30.4-32.0) | 7,967                                                                                                          | 27.9 (27.4-28.4) | 6,896                                                                                          | 28.6 (28.0-29.2) |
| <b>Sex at birth</b>   |                                                                                       |                  |                                                                                                                      |                  |                                                                                                                |                  |                                                                                                |                  |
| Female                | 21,775                                                                                | 51.3 (50.8-51.8) | 6,794                                                                                                                | 48.9 (48.1-49.7) | 14,981                                                                                                         | 47.5 (47.0-48.1) | 12,818                                                                                         | 53.2 (52.5-53.8) |
| Male                  | 20,682                                                                                | 48.7 (48.2-49.2) | 7,104                                                                                                                | 51.1 (50.3-51.9) | 13,578                                                                                                         | 52.5 (51.9-53.0) | 11,294                                                                                         | 46.8 (46.2-47.5) |
| <b>Province</b>       |                                                                                       |                  |                                                                                                                      |                  |                                                                                                                |                  |                                                                                                |                  |
| Newfoundland          | 2,672                                                                                 | 6.3 (6.1-6.5)    | 981                                                                                                                  | 7.1 (6.6-7.5)    | 1,691                                                                                                          | 5.9 (5.7-6.2)    | 1,371                                                                                          | 5.7 (5.4-6.0)    |
| Prince Edward Island  | 794                                                                                   | 1.9 (1.7-2.0)    | 325                                                                                                                  | 2.3 (2.1-2.6)    | 469                                                                                                            | 1.6 (1.5-1.8)    | 389                                                                                            | 1.6 (1.5-1.8)    |
| Nova Scotia           | 3,784                                                                                 | 8.9 (8.6-9.2)    | 1,240                                                                                                                | 8.9 (8.5-9.4)    | 2,544                                                                                                          | 8.9 (8.6-9.2)    | 2,154                                                                                          | 8.9 (8.6-9.3)    |
| New Brunswick         | 1,011                                                                                 | 2.4 (2.2-2.5)    | 445                                                                                                                  | 3.2 (2.9-3.5)    | 566                                                                                                            | 2.0 (1.8-2.2)    | 455                                                                                            | 1.9 (1.7-2.1)    |
| Quebec                | 8,251                                                                                 | 19.4 (19.1-19.8) | 3,051                                                                                                                | 22.0 (21.3-22.7) | 5,200                                                                                                          | 18.2 (17.8-18.7) | 4,353                                                                                          | 18.1 (17.6-18.5) |
| Ontario               | 9,296                                                                                 | 21.9 (21.5-22.3) | 2,727                                                                                                                | 19.6 (19.0-20.3) | 6,569                                                                                                          | 23.0 (22.5-23.5) | 5,580                                                                                          | 23.1 (22.6-23.7) |
| Manitoba              | 3,670                                                                                 | 8.6 (8.4-8.9)    | 1,131                                                                                                                | 8.1 (7.7-8.6)    | 2,539                                                                                                          | 9.0 (8.6-9.2)    | 2,185                                                                                          | 9.1 (8.7-9.4)    |
| Saskatchewan          | 1,019                                                                                 | 2.4 (2.3-2.6)    | 374                                                                                                                  | 2.7 (2.4-3.0)    | 645                                                                                                            | 2.3 (2.1-2.4)    | 568                                                                                            | 2.4 (2.2-2.6)    |
| Alberta               | 4,216                                                                                 | 9.9 (9.6-10.2)   | 1,324                                                                                                                | 9.5 (9.0-10.0)   | 2,892                                                                                                          | 10.1 (9.8-10.5)  | 2,414                                                                                          | 10.0 (9.6-10.4)  |
| British Columbia      | 7,740                                                                                 | 18.2 (17.9-18.6) | 2,299                                                                                                                | 16.5 (15.9-17.2) | 5,441                                                                                                          | 19.1 (18.6-19.5) | 4,643                                                                                          | 19.3 (18.8-19.8) |
| Yukon                 | 2                                                                                     | 0.0              | 0                                                                                                                    | 0.0              | 2                                                                                                              | 0.0              | 0                                                                                              | 0.0              |
| Northwest Territories | 1                                                                                     | 0.0              | 1                                                                                                                    | 0.0              | 0                                                                                                              | 0.0              | 0                                                                                              | 0.0              |
| Nunavut               | 1                                                                                     | 0.0              | 0                                                                                                                    | 0.0              | 1                                                                                                              | 0.0              | 0                                                                                              | 0.0              |

(\*) Demographic characteristics not available for 54/42,511 individuals who were invited to participate in the COVID-19 survey (all non-responders).

**Web Table 2: Distribution of self-reported reasons for being likely to receive a COVID-19 vaccine.** The 19,961 participants who reported that they were very or somewhat likely to receive a COVID-19 vaccine could select their primary reason from a list of five options or select 'other'. The percentage of participants providing each response and 95% CIs are shown by demographic category.

|                                       | Responders | I want to protect myself | I want to protect my family and loved ones | I am concerned about COVID-19 in general | I want to contribute to ending COVID-19 outbreaks | My doctor or other health care professional recommends vaccines | Other         |
|---------------------------------------|------------|--------------------------|--------------------------------------------|------------------------------------------|---------------------------------------------------|-----------------------------------------------------------------|---------------|
|                                       | N          | % (95% CI)               | % (95% CI)                                 | % (95% CI)                               | % (95% CI)                                        | % (95% CI)                                                      | % (95% CI)    |
| <b>Overall</b>                        | 19,961     | 37.5 (36.8,38.2)         | 25.7 (25.1,26.3)                           | 10.3 (9.9,10.7)                          | 24.0 (23.4,24.6)                                  | 1.9 (1.7,2.1)                                                   | 0.6 (0.5,0.8) |
| <b>Age group</b>                      |            |                          |                                            |                                          |                                                   |                                                                 |               |
| 50–54                                 | 897        | 26.1 (23.3,29.1)         | 33.0 (30.0,36.1)                           | 8.4 (6.7,10.4)                           | 30.2 (27.3,33.3)                                  | 1.0 (0.5,1.9)                                                   | 1.3 (0.8,2.3) |
| 55–64                                 | 5,849      | 29.2 (28.1,30.4)         | 29.9 (28.8,31.1)                           | 10.1 (9.3,10.8)                          | 28.6 (27.4,29.8)                                  | 1.6 (1.3,1.9)                                                   | 0.6 (0.5,0.9) |
| 65–74                                 | 7,464      | 40.2 (39.1,41.3)         | 24.2 (23.3,25.2)                           | 10.3 (9.6,11.0)                          | 23.2 (22.2,24.2)                                  | 1.6 (1.4,1.9)                                                   | 0.5 (0.3,0.7) |
| ≥75                                   | 5,731      | 44.2 (42.9,45.5)         | 22.1 (21.0,23.1)                           | 10.8 (10.0,11.6)                         | 19.5 (18.5,20.5)                                  | 2.8 (2.4,3.2)                                                   | 0.7 (0.5,1.0) |
| <b>Sex at birth</b>                   |            |                          |                                            |                                          |                                                   |                                                                 |               |
| Male                                  | 9,855      | 36.6 (35.6,37.5)         | 28.8 (27.9,29.7)                           | 9.6 (9.0,10.1)                           | 22.5 (21.7,23.4)                                  | 1.9 (1.7,2.2)                                                   | 0.6 (0.5,0.8) |
| Female                                | 10,106     | 38.4 (37.4,39.3)         | 22.7 (21.9,23.5)                           | 10.9 (10.3,11.5)                         | 25.5 (24.6,26.3)                                  | 1.9 (1.6,2.2)                                                   | 0.7 (0.5,0.9) |
| <b>Education</b>                      |            |                          |                                            |                                          |                                                   |                                                                 |               |
| Less than secondary school graduation | 779        | 41.8 (38.4,45.3)         | 25.7 (22.7,28.9)                           | 9.5 (7.6,11.8)                           | 19.0 (16.4,21.9)                                  | 3.3 (2.3,4.9)                                                   | 0.6 (0.3,1.5) |
| Secondary school graduation           | 1804       | 36.1 (34.0,38.4)         | 27.8 (25.8,29.9)                           | 11.9 (10.5,13.5)                         | 21.5 (19.6,23.4)                                  | 2.2 (1.6,3.0)                                                   | 0.5 (0.3,1.0) |
| Some post-secondary education         | 1,383      | 34.9 (32.4,37.4)         | 26.0 (23.8,28.4)                           | 12.9 (11.3,14.8)                         | 22.8 (20.6,25.1)                                  | 2.7 (1.9,3.7)                                                   | 0.7 (0.4,1.3) |
| Post-secondary degree/diploma         | 15,963     | 37.7 (36.9,38.4)         | 25.4 (24.7,26.1)                           | 9.9 (9.4,10.3)                           | 24.7 (24.0,25.3)                                  | 1.7 (1.6,2.0)                                                   | 0.7 (0.5,0.8) |
| Not available                         | 32         | 34.4 (20.2,52.1)         | 21.9 (10.8,39.3)                           | 15.6 (6.7,32.5)                          | 28.1 (15.3,45.8)                                  | 0.0                                                             | 0.0           |
| <b>Annual household income</b>        |            |                          |                                            |                                          |                                                   |                                                                 |               |
| <\$20,000                             | 562        | 45.9 (41.8,50.0)         | 16.9 (14.0,20.2)                           | 9.4 (7.3,12.1)                           | 22.6 (19.3,26.2)                                  | 4.1 (2.7,6.1)                                                   | 1.1 (0.5,2.4) |
| \$20,000–\$49,999                     | 3,713      | 40.2 (38.6,41.7)         | 22.5 (21.2,23.9)                           | 10.9 (9.9,12.0)                          | 22.9 (21.6,24.3)                                  | 2.6 (2.1,3.1)                                                   | 0.9 (0.7,1.3) |
| \$50,000–\$99,999                     | 7,217      | 37.2 (36.1,38.3)         | 26.2 (25.2,27.2)                           | 10.4 (9.7,11.1)                          | 23.8 (22.8,24.8)                                  | 1.9 (1.6,2.2)                                                   | 0.5 (0.4,0.7) |
| \$100,000–\$149,999                   | 3,989      | 35.5 (34.0,37.0)         | 27.7 (26.3,29.0)                           | 10.2 (9.3,11.1)                          | 24.8 (23.5,26.2)                                  | 1.5 (1.2,1.9)                                                   | 0.4 (0.2,0.6) |
| ≥\$150,000                            | 3,375      | 34.9 (33.3,36.6)         | 28.0 (26.5,29.6)                           | 9.4 (8.4,10.4)                           | 25.8 (24.4,27.3)                                  | 1.2 (0.8,1.6)                                                   | 0.7 (0.5,1.1) |
| Not available                         | 1,105      | 41.1 (38.2,44.0)         | 22.7 (20.3,25.3)                           | 11.0 (9.2,12.9)                          | 21.7 (19.4,24.2)                                  | 2.5 (1.8,3.6)                                                   | 1.0 (0.6,1.8) |
| <b>Race</b>                           |            |                          |                                            |                                          |                                                   |                                                                 |               |
| Non-white                             | 671        | 30.0 (26.6,33.5)         | 30.4 (27.0,34.0)                           | 11.6 (9.4,14.3)                          | 24.7 (21.6,28.1)                                  | 2.5 (1.6,4.0)                                                   | 0.7 (0.3,1.8) |
| white                                 | 19,266     | 37.8 (37.1,38.4)         | 25.5 (24.9,26.1)                           | 10.2 (9.8,10.7)                          | 24.0 (23.4,24.6)                                  | 1.9 (1.7,2.1)                                                   | 0.6 (0.5,0.8) |
| Not available                         | 24         | 29.2 (14.6,49.8)         | 37.5 (20.8,57.8)                           | 4.2 (0.6,24.4)                           | 25.0 (11.7,45.6)                                  | 4.2 (0.6,24.4)                                                  | 0.0           |
| <b>Province</b>                       |            |                          |                                            |                                          |                                                   |                                                                 |               |
| Newfoundland                          | 1,159      | 38.1 (35.4,41.8)         | 27.7 (25.2,30.3)                           | 11.0 (9.4,13.0)                          | 20.9 (18.6,23.3)                                  | 1.8 (1.2,2.8)                                                   | 0.4 (0.2,1.0) |
| Prince Edward Island                  | 317        | 39.1 (33.9,44.6)         | 22.7 (18.4,27.7)                           | 9.8 (7.0,13.6)                           | 28.1 (23.4,33.3)                                  | 0.3 (0.0,2.2)                                                   | 0.0           |
| Nova Scotia                           | 1,872      | 34.4 (32.3,36.6)         | 27.8 (25.8,29.9)                           | 11.6 (10.3,13.2)                         | 23.7 (21.8,25.7)                                  | 2.0 (1.5,2.8)                                                   | 0.4 (0.2,0.8) |
| New Brunswick                         | 360        | 31.1 (26.5,36.1)         | 31.9 (27.3,36.9)                           | 9.7 (7.1,13.2)                           | 22.5 (18.5,27.1)                                  | 4.2 (2.5,6.8)                                                   | 0.6 (0.1,2.2) |
| Quebec                                | 3,411      | 43.1 (41.5,44.8)         | 22.2 (20.9,23.6)                           | 8.0 (7.1,9.0)                            | 25.1 (23.7,26.6)                                  | 1.3 (1.0,1.8)                                                   | 0.2 (0.1,0.4) |
| Ontario                               | 4,688      | 37.2 (35.9,38.6)         | 26.6 (25.4,27.9)                           | 9.5 (8.7,10.4)                           | 24.1 (22.9,25.3)                                  | 2.0 (1.6,2.4)                                                   | 0.6 (0.4,0.8) |
| Manitoba                              | 1,794      | 36.5 (34.3,38.7)         | 25.2 (23.2,27.3)                           | 11.0 (9.7,12.6)                          | 23.9 (22.0,25.9)                                  | 2.6 (2.0,3.5)                                                   | 0.8 (0.5,1.3) |
| Saskatchewan                          | 451        | 35.3 (31.0,39.8)         | 31.5 (27.4,35.9)                           | 11.5 (8.9,14.8)                          | 19.7 (16.3,23.7)                                  | 1.1 (0.5,2.6)                                                   | 0.9 (0.3,2.3) |
| Alberta                               | 1,955      | 35.0 (33.0,37.2)         | 27.1 (25.2,29.1)                           | 11.5 (10.2,13.0)                         | 24.0 (22.2,26.0)                                  | 1.5 (1.0,2.1)                                                   | 0.8 (0.5,1.3) |
| British Columbia                      | 3,954      | 36.5 (35.1,38.1)         | 24.4 (23.1,25.8)                           | 11.2 (10.3,12.3)                         | 24.4 (23.1,25.8)                                  | 2.2 (1.8,2.7)                                                   | 1.2 (0.9,1.6) |
| <b>Urban/Rural</b>                    |            |                          |                                            |                                          |                                                   |                                                                 |               |
| Rural                                 | 3,315      | 34.8 (33.2,36.4)         | 26.9 (25.4,28.4)                           | 11.2 (10.1,12.3)                         | 24.8 (23.3,26.3)                                  | 1.8 (1.4,2.4)                                                   | 0.6 (0.4,0.9) |
| Urban                                 | 16,540     | 38.0 (37.3,38.8)         | 25.4 (24.8,26.1)                           | 10.1 (9.6,10.5)                          | 23.9 (23.3,24.6)                                  | 1.9 (1.7,2.1)                                                   | 0.7 (0.5,0.8) |
| Not available                         | 106        | 38.7 (29.9,48.3)         | 28.3 (20.6,37.6)                           | 12.3 (7.3,20.0)                          | 17.9 (11.7,26.4)                                  | 1.9 (0.5,7.2)                                                   | 0.9 (0.1,6.4) |

**Web Table 3: Response options for survey questions about prior influenza vaccination history and pandemic-related factors of interest.**

| Survey question                                                                                                                      | Possible responses                                                                                                                       | Categorization for analysis                                      | Covariate                                             |
|--------------------------------------------------------------------------------------------------------------------------------------|------------------------------------------------------------------------------------------------------------------------------------------|------------------------------------------------------------------|-------------------------------------------------------|
| <b>Have you received a seasonal flu vaccination since September 1st 2020?</b>                                                        | No, and I do not plan to receive a flu vaccine<br>No, but I plan to receive a flu vaccine<br>Yes<br>Don't know/No answer/Refused/Missing | No/Not planning to<br>Planning to<br>Vaccinated<br>Not available | Influenza vaccination status (Fall 2020)              |
| <b>How likely do you think it is that you have ever been infected with the virus that causes COVID-19?</b>                           | Very likely<br>Somewhat likely<br>Uncertain<br>Somewhat unlikely<br>Very unlikely<br>Don't know/No answer/Refused/Missing                | Likely<br><br>Uncertain<br>Unlikely<br>Not available             | Believe previously infected with SARS-CoV-2           |
| <b>Taking everything about COVID-19 into account, how would you describe the consequences of COVID-19 on you and your household?</b> | Very positive<br>Positive<br>No effect<br>Negative<br>Very negative<br>Don't know/No answer/Refused/Missing                              | Positive<br><br>No effect<br>Negative<br>Not available           | Consequences of COVID-19 on participant and household |

**Web Table 4: Distribution of self-reported influenza vaccination status (fall 2020), belief in having been previously infected with SARS-CoV-2, and impact of the pandemic on participant and household.** The percentage of participants providing each response and 95% CIs are shown by response category; participants who provided a response about their likelihood of receiving a COVID-19 vaccine were included in this analysis (n = 23,819).

|                                                              | Total         | Likely to Receive COVID-19 vaccine |                  | Unlikely to receive COVID-19 vaccine |                  |
|--------------------------------------------------------------|---------------|------------------------------------|------------------|--------------------------------------|------------------|
|                                                              | N (%)         | N                                  | % (95% CI)       | N                                    | % (95% CI)       |
| <b>Influenza vaccination status (Fall 2020)</b>              |               |                                    |                  |                                      |                  |
| No/Not planning to                                           | 4,221 (17.7)  | 2,139                              | 50.7 (49.2,52.2) | 2,082                                | 49.3 (47.8,50.8) |
| Planning to                                                  | 12,201 (51.2) | 11,102                             | 91.0 (90.5,91.5) | 1,099                                | 9.0 (8.5,9.5)    |
| Vaccinated                                                   | 7,192 (30.2)  | 6,680                              | 92.9 (92.3,93.5) | 512                                  | 7.1 (6.5,7.7)    |
| Not available                                                | 205 (0.9)     | 123                                | 60.0 (53.1,66.5) | 82                                   | 40.0 (33.5,46.9) |
| <b>Believe previously infected with SARS-CoV-2</b>           |               |                                    |                  |                                      |                  |
| Likely                                                       | 1,063 (4.5)   | 836                                | 78.6 (76.1,81.0) | 227                                  | 21.4 (19.0,23.9) |
| Uncertain                                                    | 1,893 (8.1)   | 1,494                              | 78.9 (77.0,80.7) | 399                                  | 21.1 (19.3,23.0) |
| Unlikely                                                     | 20,487 (87.4) | 17,421                             | 85.0 (84.5,85.5) | 3,066                                | 15.0 (14.5,15.5) |
| Not available                                                | 376 (1.6)     | 293                                | 77.9 (73.5,81.8) | 83                                   | 22.1 (18.2,26.5) |
| <b>Consequences of COVID-19 on participant and household</b> |               |                                    |                  |                                      |                  |
| Positive                                                     | 1,534 (6.4)   | 1,233                              | 80.4 (78.3,82.3) | 301                                  | 19.6 (17.7,21.7) |
| No effect                                                    | 6,941 (29.1)  | 5,616                              | 80.9 (80.0,81.8) | 1,325                                | 19.1 (18.2,20.0) |
| Negative                                                     | 14,529 (61.0) | 12,561                             | 86.5 (85.9,87.0) | 1,968                                | 13.5 (13.0,14.1) |
| Not available                                                | 815 (3.4)     | 634                                | 77.8 (74.8,80.5) | 181                                  | 22.2 (19.5,25.2) |

**Web Table 5: Association between participants' sociodemographic characteristics and being likely to receive a COVID-19 vaccine.** Unadjusted and adjusted odds ratios (ORs) and 95% confidence intervals (CIs) are drawn from logistic regression models.

|                                       | Unadjusted OR (95% CI) | Adjusted OR (95% CI) |
|---------------------------------------|------------------------|----------------------|
| <b>Sex at birth</b>                   |                        |                      |
| Female                                | Ref.                   | Ref.                 |
| Male                                  | 1.9 (1.8, 2.0)         | 1.7 (1.5, 1.8)       |
| <b>Age group</b>                      |                        |                      |
| 50–54                                 | Ref.                   | Ref.                 |
| 55–64                                 | 1.0 (0.8, 1.1)         | 1.0 (0.9, 1.2)       |
| 65–74                                 | 1.3 (1.1, 1.6)         | 1.8 (1.5, 2.1)       |
| ≥75                                   | 1.2 (1.0, 1.4)         | 1.9 (1.6, 2.3)       |
| <b>Race</b>                           |                        |                      |
| Non-white                             | Ref.                   | Ref.                 |
| white                                 | 1.9 (1.6, 2.2)         | 2.0 (1.7, 2.3)       |
| <b>Highest education</b>              |                        |                      |
| Less than secondary school graduation | Ref.                   | Ref.                 |
| Secondary school graduation           | 1.3 (1.1, 1.5)         | 1.1 (1.0, 1.4)       |
| Some post-secondary education         | 1.6 (1.4, 2.0)         | 1.3 (1.1, 1.6)       |
| Post-secondary degree/diploma         | 2.2 (2.0, 2.6)         | 1.7 (1.4, 2.0)       |
| <b>Annual household income</b>        |                        |                      |
| <\$20,000                             | Ref.                   | Ref.                 |
| \$20,000–\$49,999                     | 1.7 (1.4, 2.0)         | 1.5 (1.2, 1.7)       |
| \$50,000–\$99,999                     | 2.8 (2.4, 3.2)         | 2.3 (1.9, 2.7)       |
| \$100,000–\$149,999                   | 3.4 (2.8, 4.0)         | 3.0 (2.5, 3.6)       |
| ≥\$150,000                            | 4.6 (3.8, 5.5)         | 4.3 (3.6, 5.3)       |
| <b>Province</b>                       |                        |                      |
| Ontario                               | Ref.                   | Ref.                 |
| Newfoundland                          | 1.0 (0.9, 1.2)         | 1.1 (0.9, 1.3)       |
| Prince Edward Island                  | 0.9 (0.7, 1.2)         | 1.2 (0.9, 1.6)       |
| Nova Scotia                           | 1.3 (1.1, 1.5)         | 1.5 (1.2, 1.7)       |
| New Brunswick                         | 0.7 (0.6, 0.9)         | 0.9 (0.7, 1.2)       |
| Quebec                                | 0.7 (0.6, 0.8)         | 0.8 (0.7, 0.9)       |
| Manitoba                              | 0.9 (0.8, 1.0)         | 1.0 (0.9, 1.2)       |
| Saskatchewan                          | 0.8 (0.6, 0.9)         | 0.8 (0.7, 1.1)       |
| Alberta                               | 0.8 (0.7, 0.9)         | 0.7 (0.7, 0.9)       |
| British Columbia                      | 1.1 (1.0, 1.3)         | 1.1 (1.0, 1.3)       |
| <b>Urban/Rural</b>                    |                        |                      |
| Rural                                 | Ref.                   | Ref.                 |
| Urban                                 | 1.5 (3.5, 4.1)         | 1.4 (1.3, 1.6)       |

**Web Table 6: Association between prior influenza vaccination and pandemic-specific factors and being likely to receive a COVID-19 vaccine.** Association between three covariates of interest (self-reported influenza vaccination status during fall 2020, belief in having been infected with SARS-CoV-2, and impact of COVID-19 on the participant and their household) with being likely to receive a COVID-19 vaccine. Unadjusted and adjusted odds ratios (ORs) and 95% confidence intervals (CIs) were drawn from logistic regression models. Adjusted ORs were estimated from a model adjusted for age, sex, race, education, income, province and urban/rural area of residence as described in the methods.

|                                                        | <b>Unadjusted OR (95% CI)</b> | <b>Adjusted OR (95% CI)</b> |
|--------------------------------------------------------|-------------------------------|-----------------------------|
| <b>Influenza vaccination status (Fall 2020)</b>        |                               |                             |
| No/Not planning to                                     | Ref.                          | Ref.                        |
| Planning to                                            | 9.8 (9.0, 10.7)               | 10.5 (9.5, 11.6)            |
| Vaccinated                                             | 12.7 (11.4, 14.2)             | 14.3 (12.5, 16.2)           |
| <b>Believe previously infected with SARS-CoV-2</b>     |                               |                             |
| Likely                                                 | Ref.                          | Ref.                        |
| Uncertain                                              | 1.0 (0.8, 1.2)                | 1.1 (0.9, 1.4)              |
| Unlikely                                               | 1.5 (1.3, 1.8)                | 1.6 (1.3, 1.9)              |
| <b>Impact of COVID-19 on participant and household</b> |                               |                             |
| Positive                                               | Ref.                          | Ref.                        |
| No effect                                              | 1.0 (0.9, 1.2)                | 1.0 (0.8, 1.1)              |
| Negative                                               | 1.6 (1.4, 1.8)                | 1.3 (1.1, 1.6)              |

**Web Figure 1: Distribution of self-reported likelihood of receiving a COVID-19 vaccination, by age, sex and race.** Survey participants (n=23,819) reported whether they were very likely, somewhat likely, uncertain, somewhat unlikely, or very unlikely to receive COVID-19 vaccine.

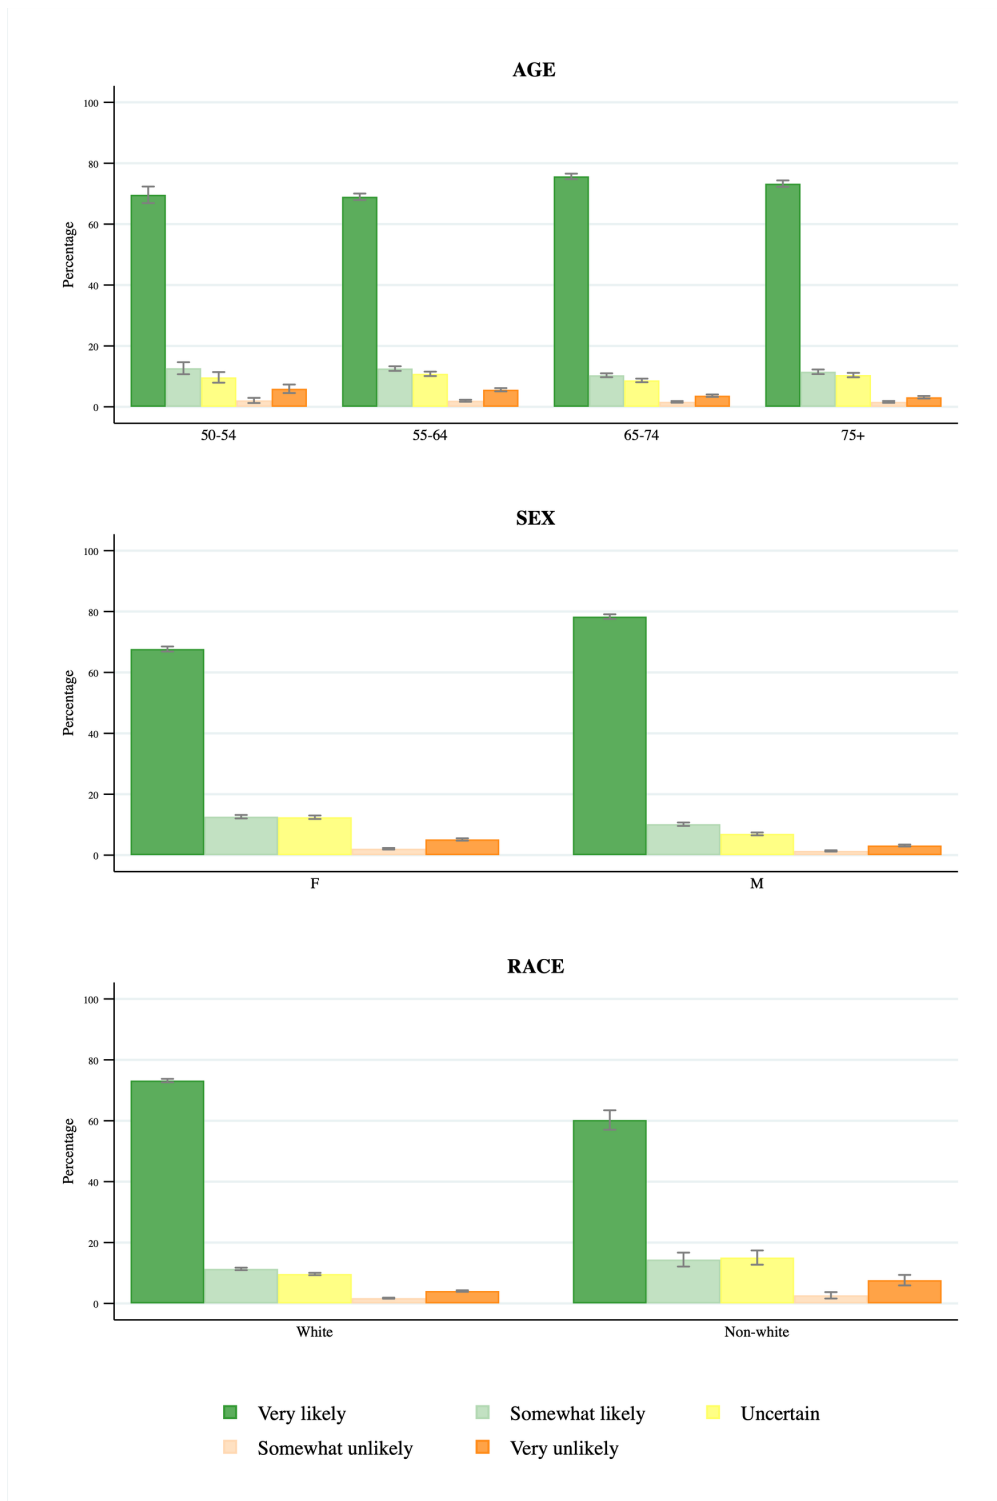



**Web Figure 2: Distribution of self-reported likelihood of receiving a COVID-19 vaccination, by education and income level.** Survey participants (n=23,819) reported whether they were very likely, somewhat likely, uncertain, somewhat unlikely, or very unlikely to receive COVID-19 vaccine.

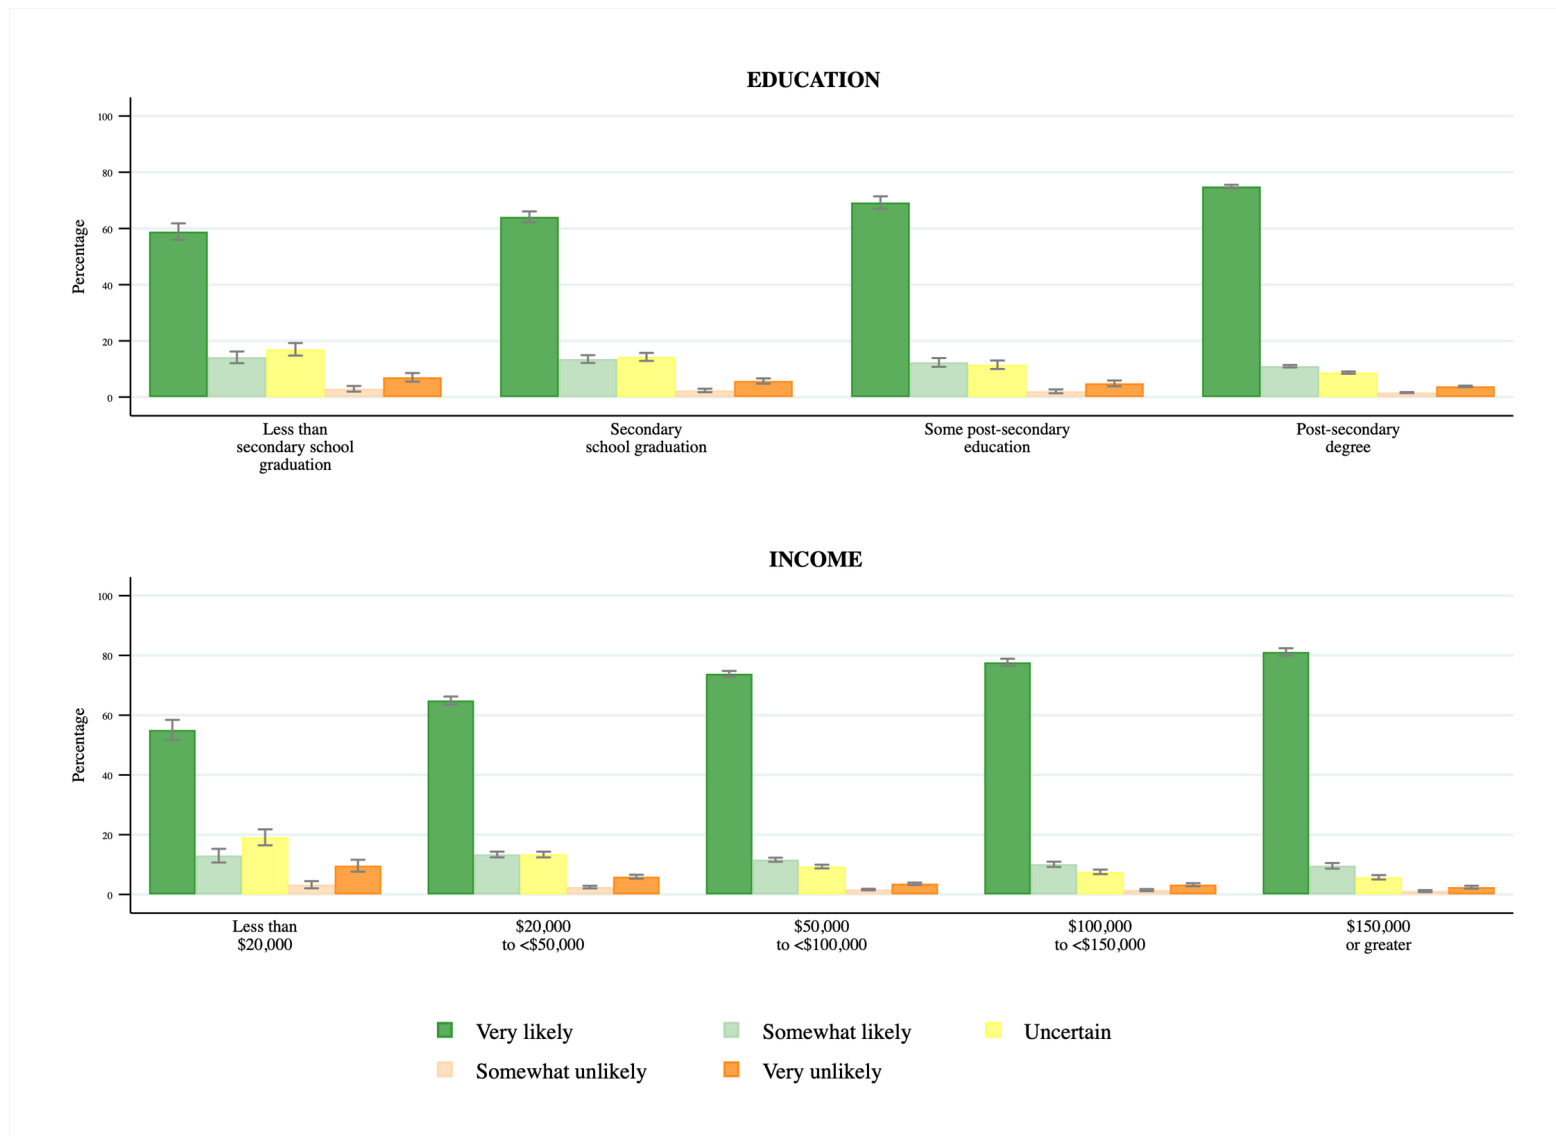

**Web Figure 3: Distribution of self-reported likelihood of receiving a COVID-19 vaccination, by province and urban/rural area of residence.** Survey participants (n=23,819) reported whether they were very likely, somewhat likely, uncertain, somewhat unlikely, or very unlikely to receive COVID-19 vaccine.

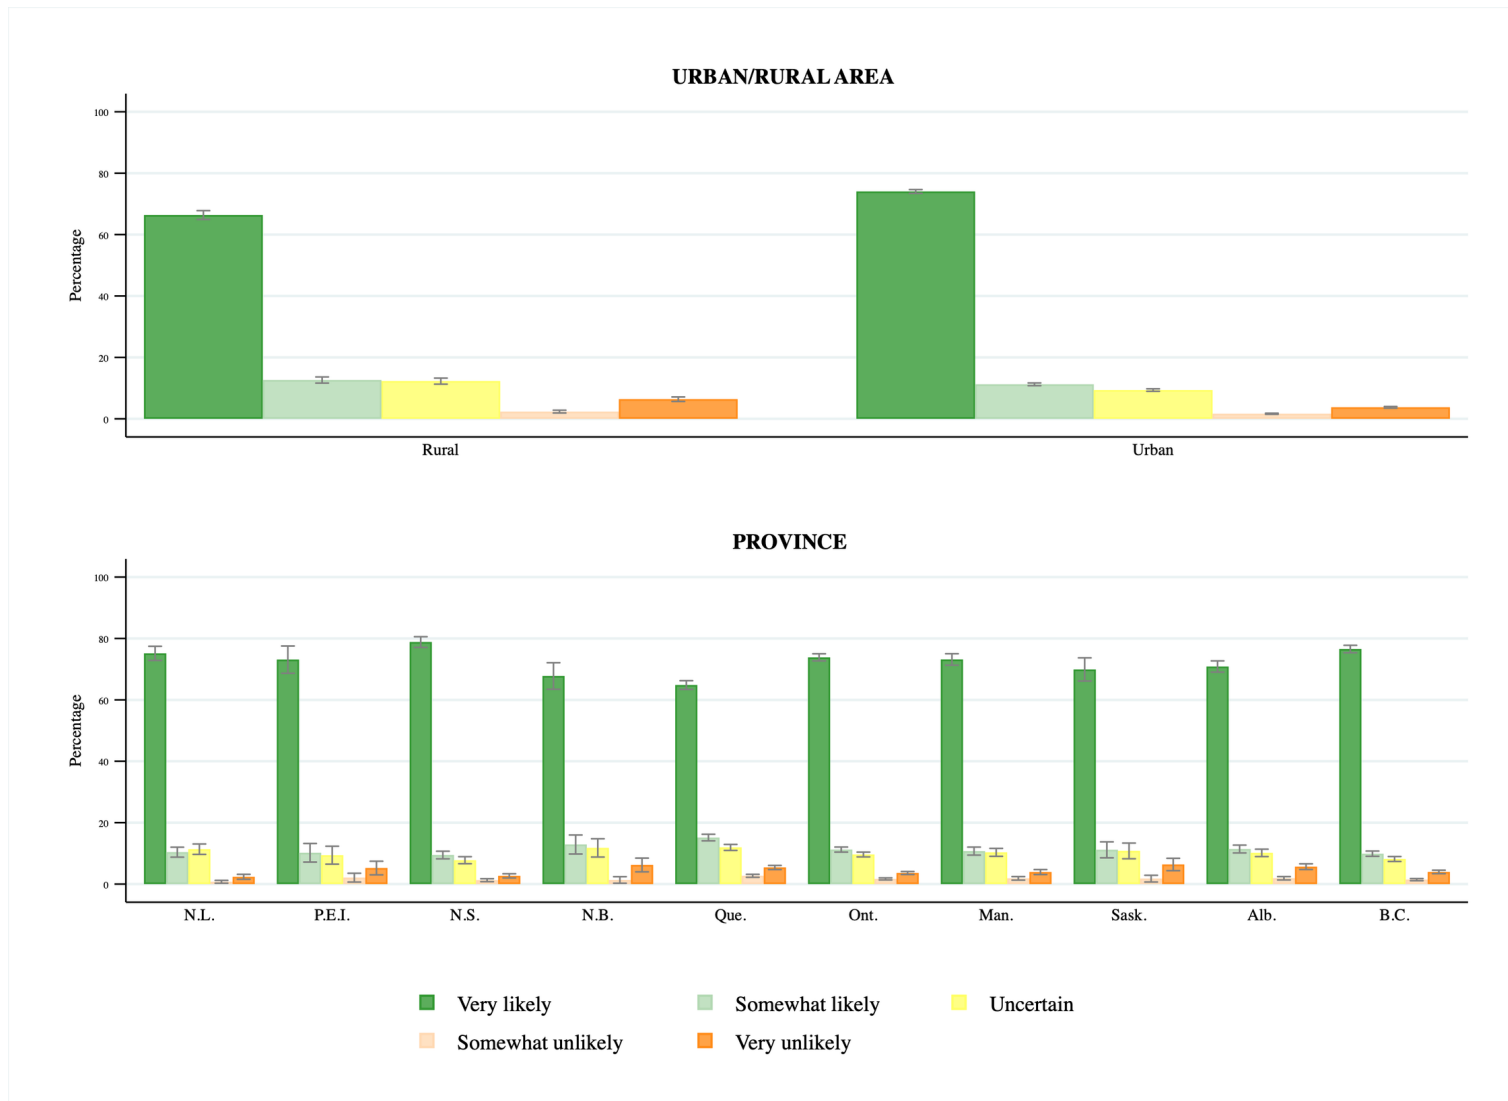

Supplement: web_material_kwac029.pdf [file web_material_kwac029.pdf]
